# Supplementary material for: Dispersive liquid–liquid micro-extraction for simultaneous preconcentration of 14 lanthanides at parts per trillion levels from groundwater and determination using a micro-flow nebulizer in inductively coupled plasma-quadrupole mass spectrometry
Source: Royal Society of Chemistry journal article supplement (doi:10.1039/c2ja30066d), 2012-01-01
Supplement: c2ja30066d.pdf [file c2ja30066d.pdf]

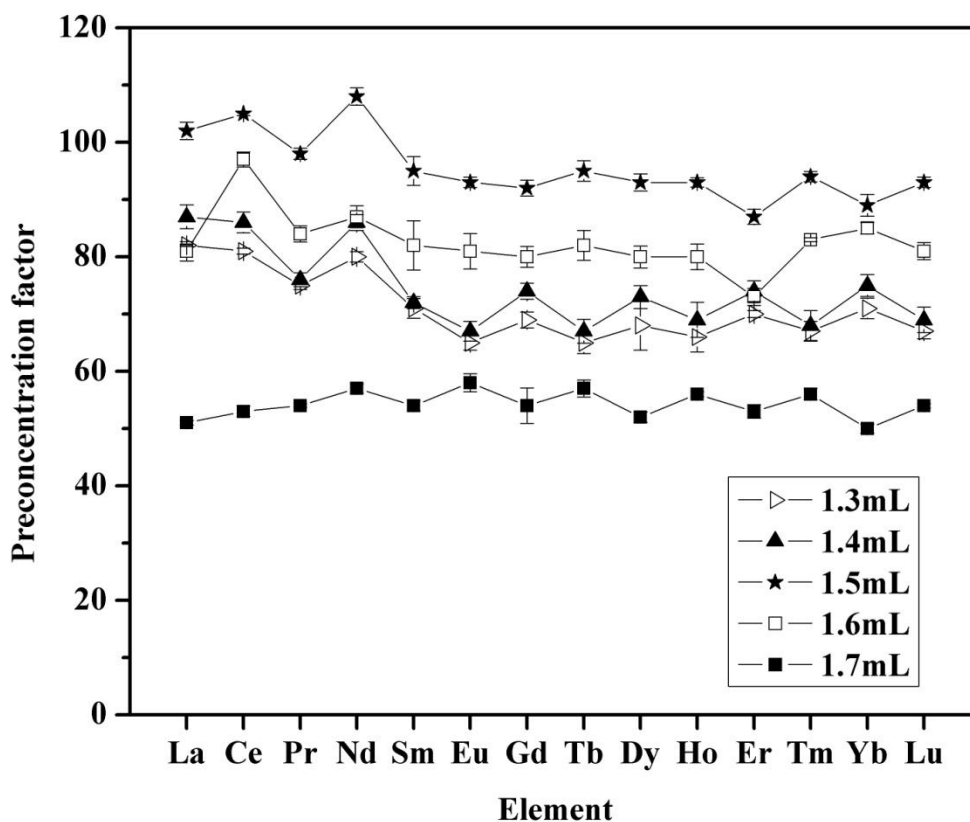

**Fig. 1** Effect of disperser solvent (MeOH) volume (in mL) on the preconcentration factor of REEs obtained from DLLME. Extraction conditions: water sample volume = 50mL; extractant solvent ( $\text{CHCl}_3$ ) volume = 600 $\mu\text{L}$ ; [2, 6-PDCA] =  $0.5 \times 10^{-3} \text{ mol L}^{-1}$ ; [aliquat<sup>®</sup> 336] = 8% (v/v) in  $\text{CHCl}_3$ ; pH = 4; concentration of REEs = 10 ng  $\text{L}^{-1}$ . (Error bars correspond to n = 3 replicates).

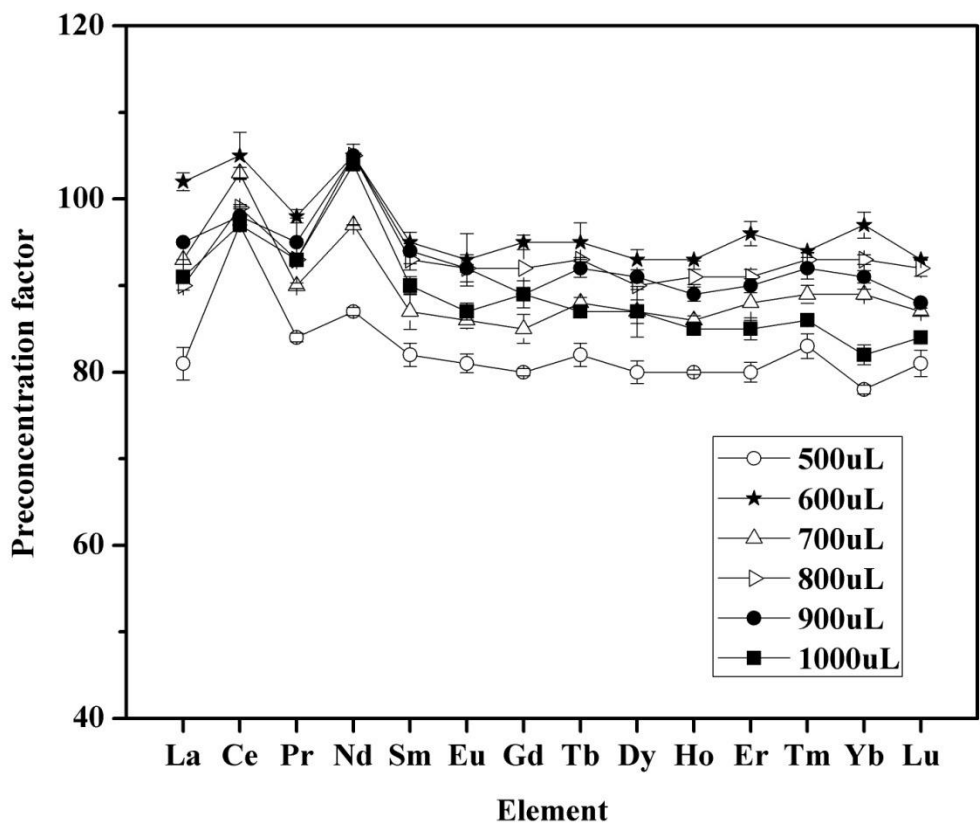

**Fig. 2** Effect of extractant solvent (CHCl<sub>3</sub>) volume (in  $\mu\text{L}$ ) on the preconcentration factor of REEs obtained from DLLME. Extraction conditions: water sample volume = 50mL; disperser solvent (MeOH) volume = 1.5mL; [2, 6-PDCA] =  $0.5 \times 10^{-3} \text{ mol L}^{-1}$ ; [aliquat<sup>®</sup> 336] = 8% (v/v) in CHCl<sub>3</sub>; pH = 4; concentration of REEs =  $10 \text{ ng L}^{-1}$ . (Error bars correspond to n = 3 replicates).

**Table 2** Volume of buffer reagents to be mixed for 50mL solution, for the pH range 3-8.

| pH | Vol. of 10mol L <sup>-1</sup> Acetic acid, mL | Vol. of 1mol L <sup>-1</sup> Sodium acetate, mL |
|----|-----------------------------------------------|-------------------------------------------------|
| 3  | 0.491                                         | 0.090                                           |
| 4  | 0.424                                         | 0.765                                           |
| 5  | 0.179                                         | 3.215                                           |
| 6  | 0.026                                         | 4.740                                           |
| pH | Vol. of 10mol L <sup>-1</sup> Phosphate, mL   | Vol. of 1mol L <sup>-1</sup> HCl, mL            |
| 7  | 0.378                                         | 1.220                                           |
| 8  | 0.478                                         | 0.225                                           |

Note: The above volumes were pipetted using a 1000 $\mu\text{L}$  eppendorf<sup>®</sup> micropipette of 1 $\mu\text{L}$  volume increment.
